# Supplementary material for: Activated layered double hydroxides: assessing the surface anion basicity and its connection with the catalytic activity in the cyanoethylation of alcohols
Source: Royal Society of Chemistry journal article supplement (doi:10.1039/d2cp02704f), 2022-01-01
Supplement: d2cp02704f1.pdf [file d2cp02704f1.pdf]

Activated layered double hydroxides: assessing the surface anion basicity and its connection with the catalytic activity in the cyanoethylation of alcohols.

Guadalupe Castro-González<sup>1</sup>, Jaime S. Valente<sup>2</sup>, Marcelo Galván<sup>1</sup> and Joel Ireta<sup>1</sup>.

<sup>1</sup>Universidad Autónoma Metropolitana-Iztapalapa, departamento de Química, CP 09340, Ciudad de México, México.

<sup>2</sup>Instituto Mexicano del Petróleo, CP 07730, Ciudad de México, México.

Supporting Information

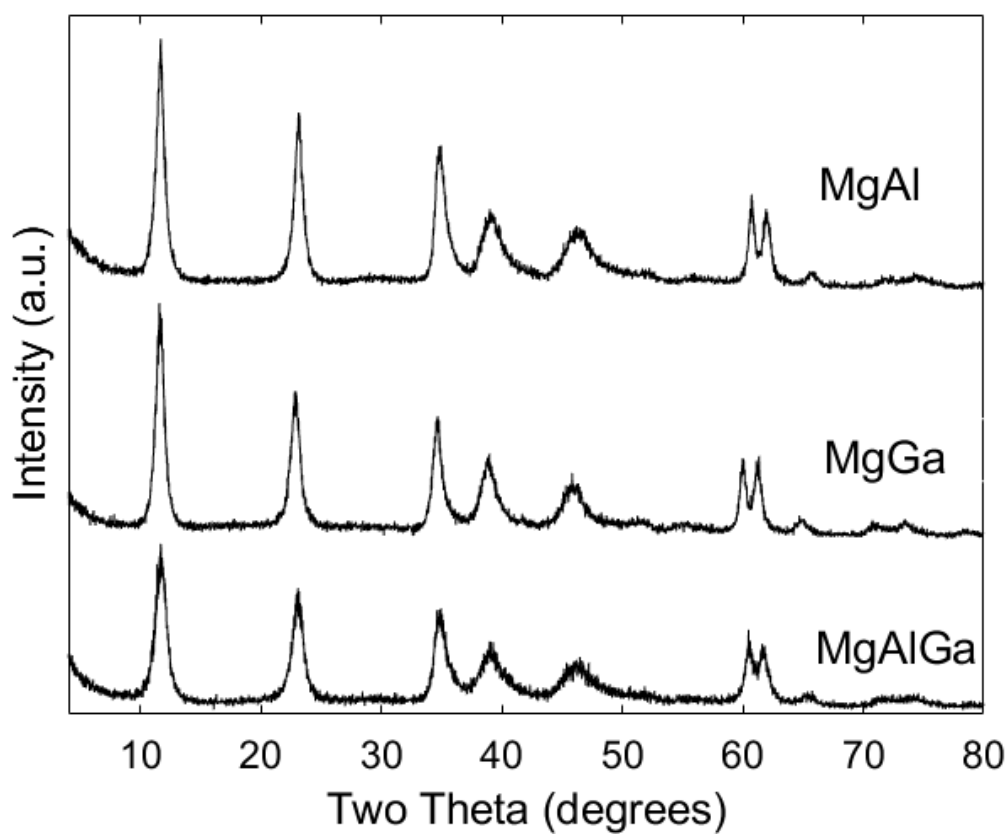

Figure 1S. X-ray diffraction patterns of as-synthesized LDHs

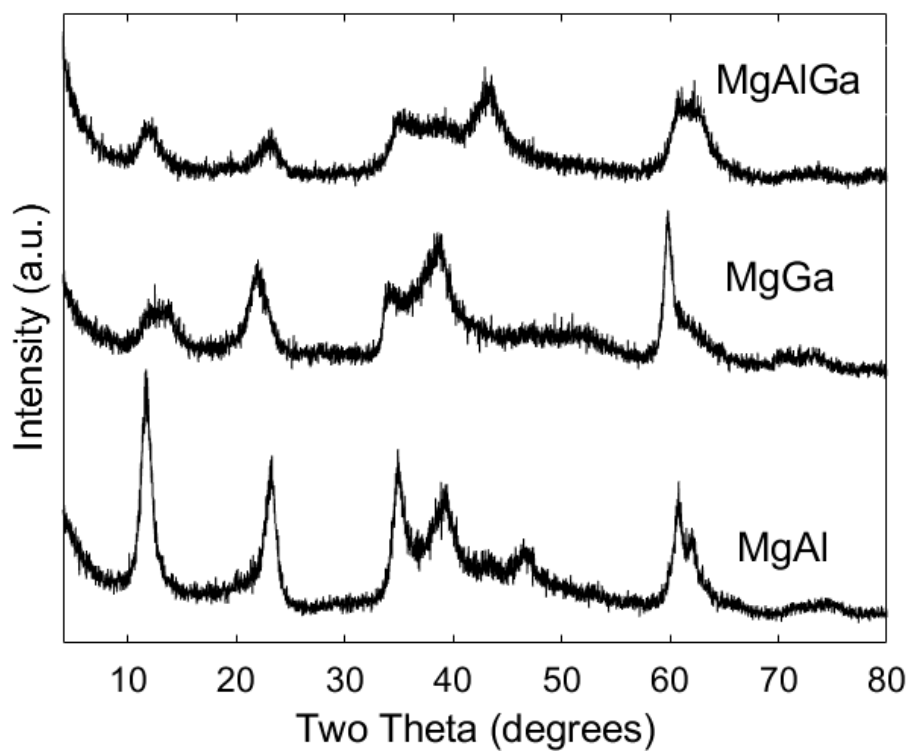

Figure 2S. X-ray diffraction patterns of rehydrated LDH catalysts

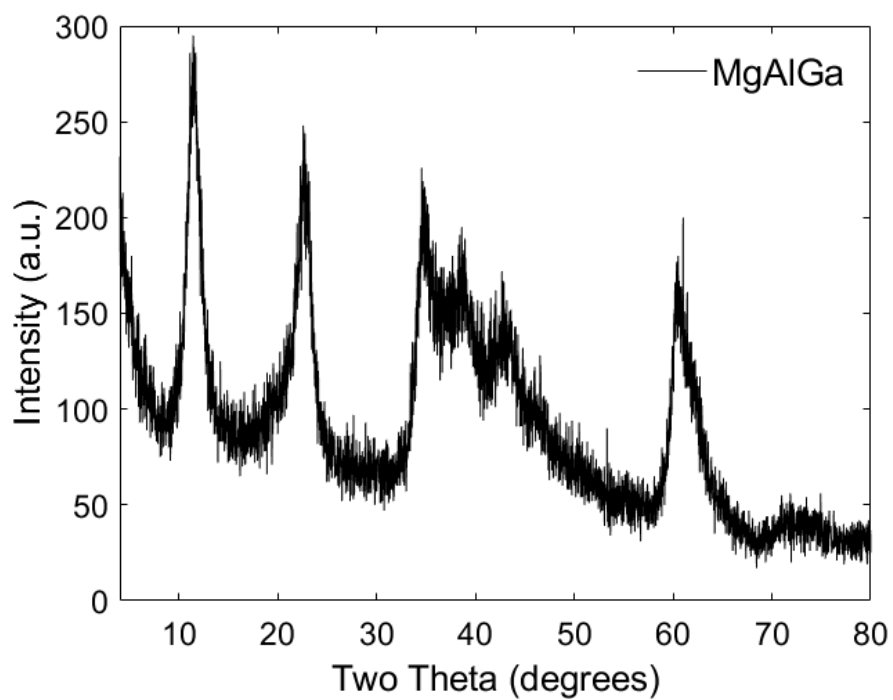

Figure 3S. X-ray diffraction patterns of MgAlGa after the reaction

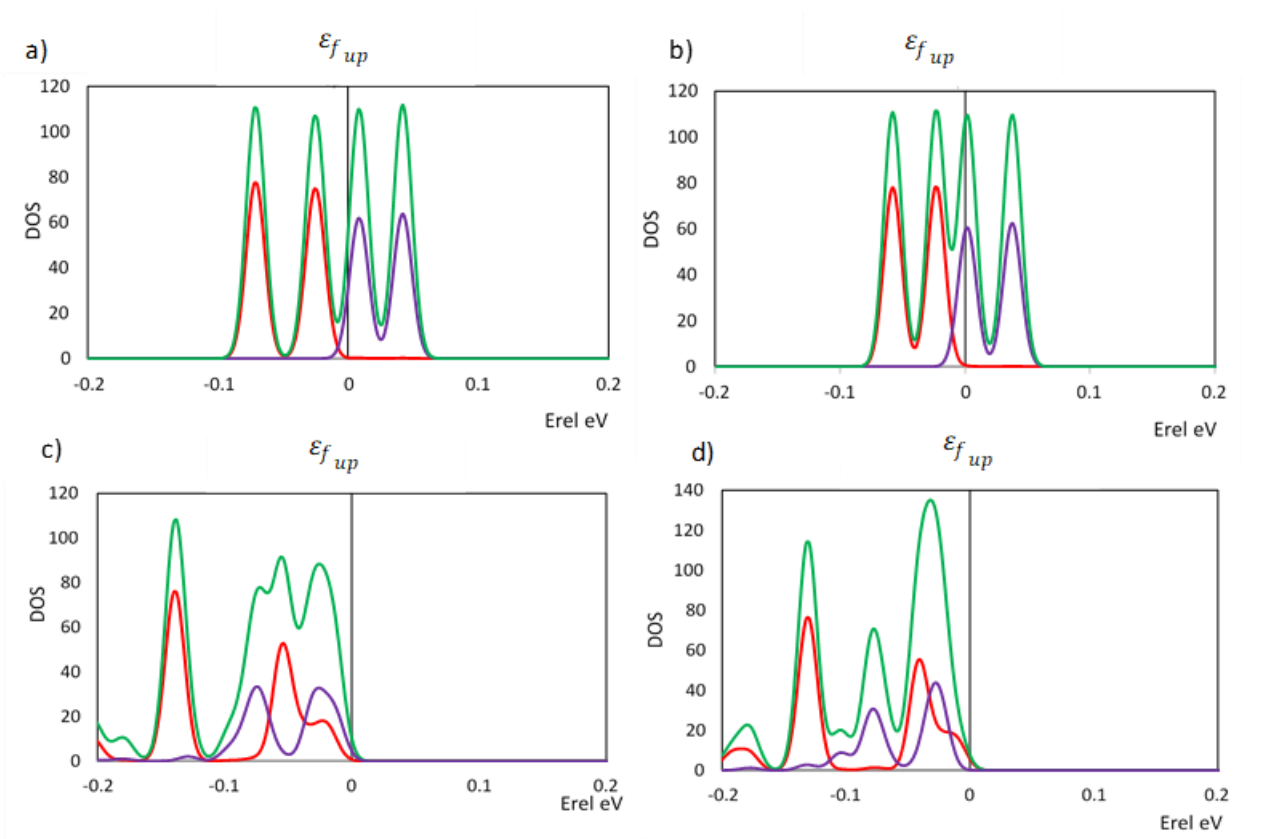

Figure 4S. Plots of DOS for a) MgAl- $OH_{surf}/OH^-$ , b) MgGa- $OH_{surf}/OH^-$ , c) ZnAl- $OH_{surf}/OH^-$ , d) ZnGa- $OH_{surf}/OH^-$ . Total DOS is shown in the green line, DOS<sub>up</sub> for up-surface in red, and pDOS for  $OH_{inf}^-$  in purple.
